# Supplementary material for: [Cu(H2btec)(bipy)]∞: a novel metal organic framework (MOF) as heterogeneous catalyst for the oxidation of olefins
Source: Royal Society of Chemistry journal article supplement (doi:10.1039/b810414j), 2009-01-01
Supplement: b810414j.pdf [file b810414j.pdf]

**Supplementary Material**

Figure S1: Simulated (black) and experimental (red) X-ray powder diffraction patterns of  $[\text{Cu}(\text{H}_2\text{btec})(\text{bipy})]_\infty$ , at room temperature

Figure S2: TGA and calculated DTA curves of  $[\text{Cu}(\text{H}_2\text{btec})(\text{bipy})]_\infty$

Figure S3: The field dependence of magnetization at two different temperatures

Figure S4: Catalytic activity of  $[\text{Cu}(\text{H}_2\text{btec})(\text{bipy})]_\infty$  for the cyclohexene oxidation. (a) Substrate conversion (%) (b) Chemoselectivity for cyclohexene epoxide (%) (white bars = 30 °C; gray bars = 50 °C; black bars = 75 °C)

Figure S5: Catalytic activity of  $[\text{Cu}(\text{H}_2\text{btec})(\text{bipy})]_\infty$  for the styrene oxidation. (a) Substrate conversion (%) (b) Chemoselectivity for styrene epoxide (%) (white bars = 30 °C; gray bars = 50 °C; black bars = 75 °C).

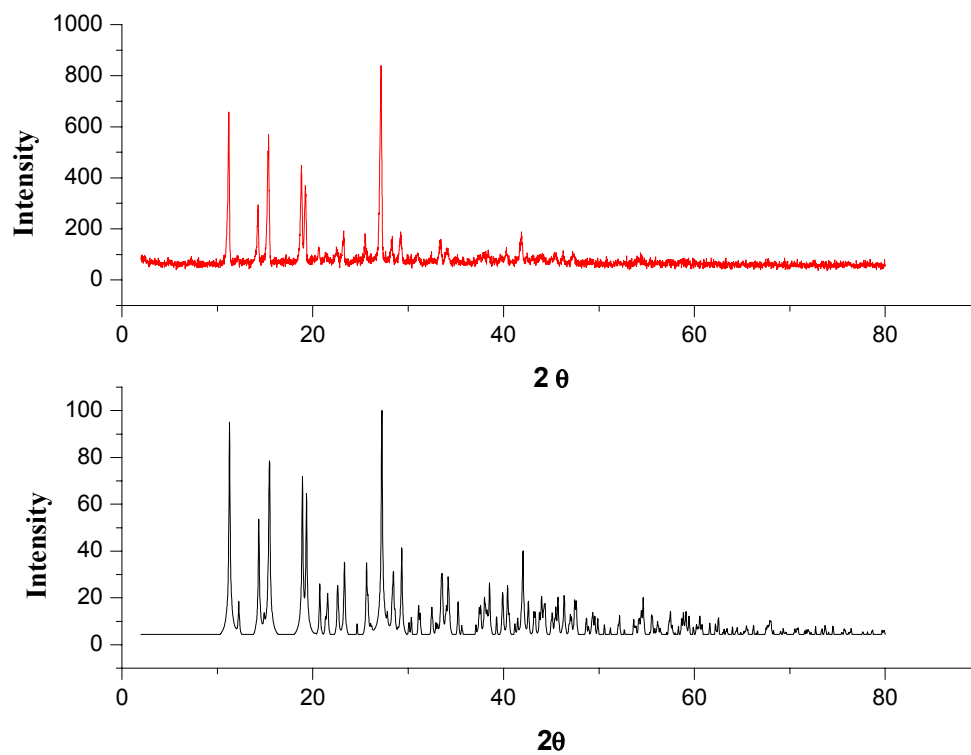

**Figure S1**

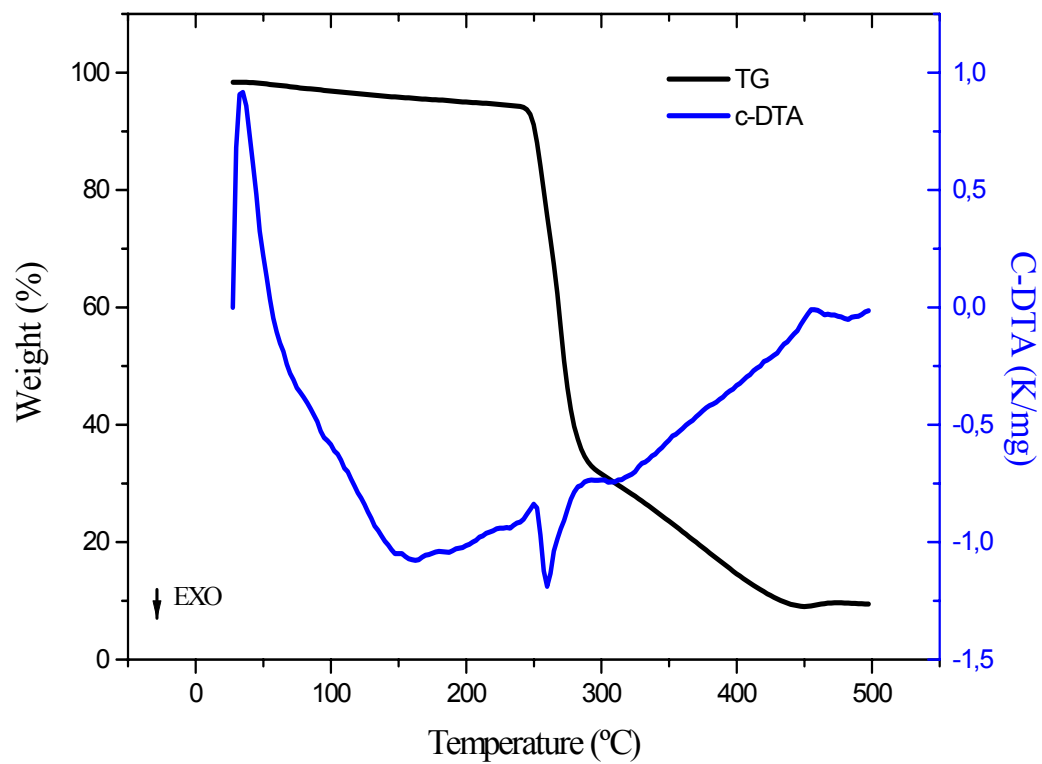

Figure S2

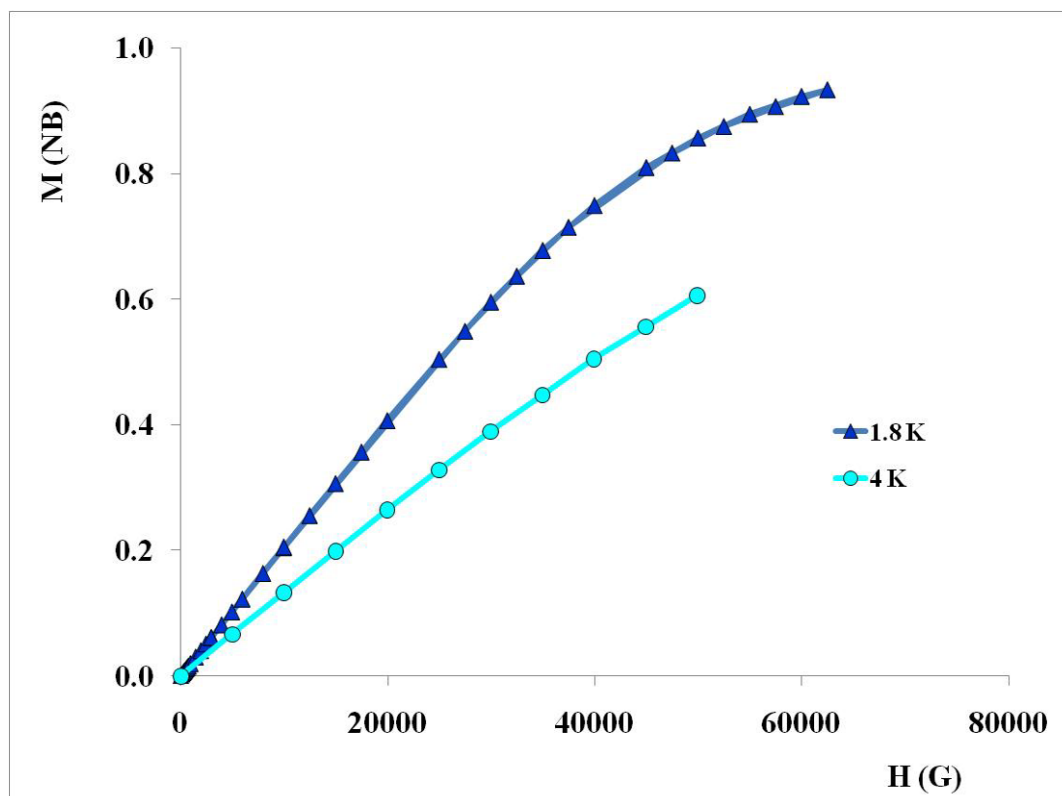

Figure S3

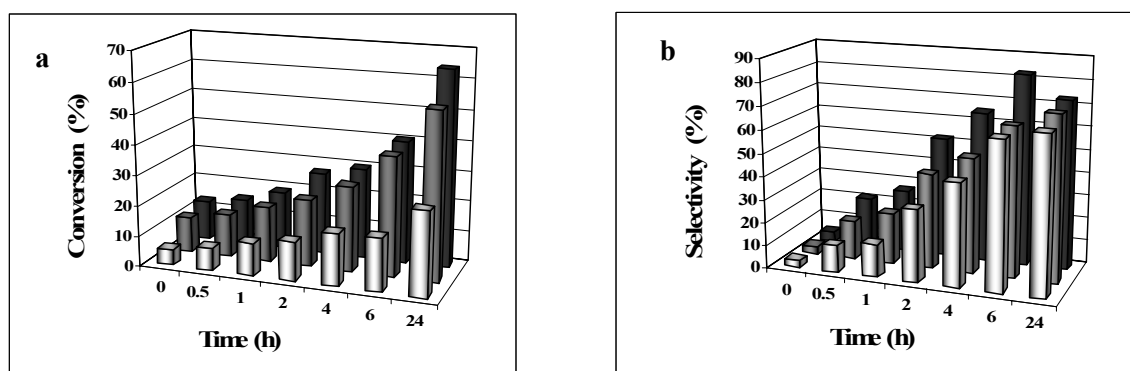

Figure S4

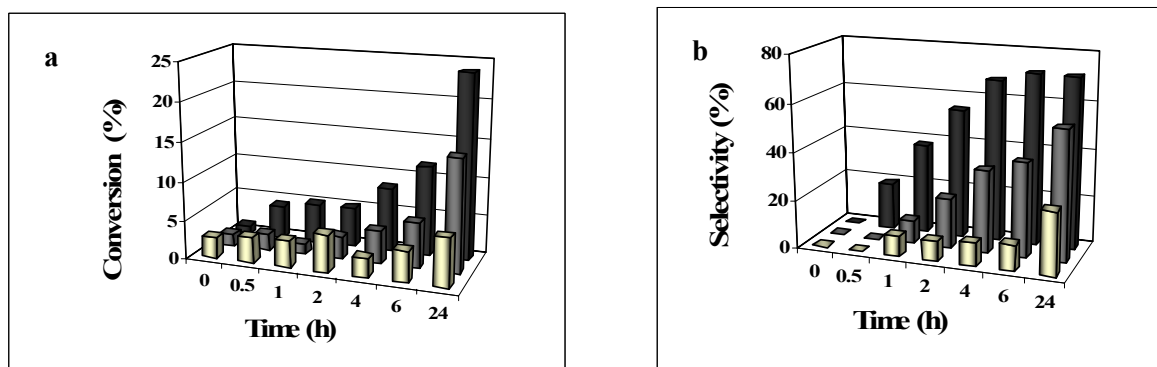

**Figure S5**
